# Supplementary material for: Philodryas (Serpentes: Dipsadidae) Envenomation, A Neglected Issue in Chile
Source: PubMed Central journal article supplement (PMC6950111; doi:10.3390/toxins11120697), 2019-11-29
Supplement: toxins-11-00697-s001.pdf [file toxins-11-00697-s001.pdf]

## Supplementary Materials: Philodryas (Serpentes: Dipsadidae) envenomation, a neglected issue in Chile.

Félix A. Urra, Alejandro Bruno Miranda-Calle and Ramiro Araya-Maturana

**Table S1: Examined Specimens.** *Philodryas chamissonis* - (Wiegmann, 1835) –.COLECCIÓN MUSEO NACIONAL DE HISTORIA NATURAL DE CHILE

(MNHN-Chile)

MNHNCL HERP 0133. País: Chile, Región: Valparaíso, Provincia: Valparaíso, Comuna: Quintero, Localidad: Bosque Las Petras. Recol.: Núñez, H., 25/may/1979.

MNHNCL HERP 0148-0149. País: Chile, Región: Metropolitana de Santiago, Provincia: Santiago, Comuna: Peñalolén, Localidad: San Luis de Macul. Recol.: Núñez, H., 3/nov/1979.

MNHNCL HERP 0489. País: Chile, Región: Metropolitana de Santiago, Provincia: Chacabuco, Comuna: Colina, Localidad: Colina. Recol.: Vizcarra, O., 8/oct/1978.

MNHNCL HERP 0490. País: Chile, Región: Metropolitana de Santiago, Provincia: Maipo, Comuna: San Bernardo, Localidad: Cerro Chena. Recol.: Arancibia, L., 22/jul/1976.

MNHNCL HERP 0491. País: Chile, Región: Metropolitana de Santiago, Provincia: Santiago, Comuna: Peñalolén, Localidad: Quebrada de Macul, parte alta. Recol.: Godoy, M., 24/nov/1976.

MNHNCL HERP 0492. País: Chile, Región: Metropolitana de Santiago, Provincia: Chacabuco, Comuna: Lampa, Localidad: Taco de Lampa. Recol.: Núñez, H., 14/sep/1980

MNHNCL HERP 0493. País: Chile, Región: Metropolitana de Santiago, Provincia: Cordillera, Comuna: Pirque, Localidad: Santa Rita. Recol.: Núñez, H. & Jarpa, M., 15/ago/1975.

MNHNCL HERP 0496. País: Chile, Región: Metropolitana de Santiago, Provincia: Maipo, Comuna: San Bernardo, Localidad: Cerro Chena. Recol.: Contreras, L., 5/sep/1976

MNHNCL HERP 0497. País: Chile, Región: Metropolitana de Santiago, Provincia: Santiago, Comuna: Peñalolén, Localidad: San Luis de Macul. Recol.: Núñez, H., 8/feb/1977.

MNHNCL HERP 0500. País: Chile, Región: Metropolitana de Santiago, Provincia: Cordillera, Comuna: Pirque, Localidad: Lo Arcaya. Recol.: Aspillaga, E. & Rodríguez, G. & Zafira, Y., 25/abr/1977.

MNHNCL HERP 0501. País: Chile, Región: Metropolitana de Santiago, Provincia: Santiago, Comuna: La Reina, Localidad: Cerros de la La Reina. Recol.: Núñez, H., 3/abr/1976

MNHNCL HERP 0503-0505. País: Chile, Región: Valparaíso, Provincia: Valparaíso, Comuna: Concón, Localidad: Concón. Recol.: Núñez, H., 29/nov/1980.

MNHNCL HERP 0553. País: Chile, Región: Metropolitana de Santiago, Provincia: Melipilla, Comuna: Melipilla, Localidad: Bollenar. Recol.: Sallaberry, M., 7/dic/1980.

MNHNCL HERP 0554. País: Chile, Región: Coquimbo, Provincia: Choapa, Comuna: Los Vilos, Localidad: Frente a Isla de Lobos. Recol.: Gajardo, C., 2/ene/1981.

MNHNCL HERP 0578. País: Chile, Región: Coquimbo, Provincia: Choapa, Comuna: Los Vilos, Localidad: Frente a Isla de Lobos. Recol.: Gajardo, M., 2/feb/1981.

MNHNCL HERP 0984. País: Chile, Región: Del Biobío, Provincia: Ñuble, Comuna: Cobquecura, Localidad: Cobquecura. Recol.: Yáñez, J. & Gajardo, M., 20/mar/1981.

MNHNCL HERP 0985. País: Chile, Región: Metropolitana de Santiago, Provincia: Santiago, Comuna: Lo Barnechea, Localidad: Lo Barnechea. Recol.: Berner, C., 6/jun/1981.

MNHNCL HERP 0986. País: Chile, Región: Coquimbo, Provincia: Choapa, Comuna: Los Vilos, Localidad: Frente a Isla de Lobos. Recol.: Arriagada, G., 24/jul/1981.

MNHNCL HERP 1037-1038. País: Chile, Región: Coquimbo, Provincia: Limarí, Comuna: Ovalle, Localidad: Fray Jorge, Parque Nacional. Recol.: Yáñez, J., 30/oct/1981.

MNHNCL HERP 1039. País: Chile, Región: Coquimbo, Provincia: Limarí, Comuna: Ovalle, Localidad: Km 300, Carretera Panamericana Norte. Recol.: Yáñez, J., 30/oct/1981

MNHNCL HERP 1068. País: Chile, Región: Metropolitana de Santiago, Provincia: Santiago, Comuna: Peñalolén, Localidad: Peñalolén. Recol.: Núñez, H., 26/dic/1981.

MNHNCL HERP 1069. País: Chile, Región: Metropolitana de Santiago, Provincia: Santiago, Comuna: Cerrillos, Localidad: Ex escuela Arquitectura. Recol.: Salinas, S., 16/nov/1981.

MNHNCL HERP 1112. País: Chile, Región: Valparaíso, Provincia: Valparaíso, Comuna: Concón, Localidad: Concón. Recol.: Núñez, H. & Yáñez, J., 25/mar/1982.

MNHNCL HERP 1211. País: Chile, Región: Metropolitana de Santiago, Provincia: Santiago, Comuna: Vitacura, Localidad: Cerro Manquehue. Recol.: Núñez, H. & Labra, J. & Labra, A., 5/sep/1982.

MNHNCL HERP 1212. Det.: Núñez, H., 29/oct/1982. País: Chile, Región: Coquimbo, Provincia: Choapa, Comuna: Los Vilos, Localidad: Quebrada El Roble. Recol.: Yáñez, J., 10/oct/1982.

MNHNCL HERP 1213-1215. País: Chile, Región: Del Maule, Provincia: Talca, Comuna: Talca, Localidad: Camarico. Recol.: Núñez, H. & Labra, J. & Labra, A., 23/oct/1982.

MNHNCL HERP 1392. País: Chile, Región: Coquimbo, Provincia: Choapa, Comuna: Illapel, Localidad: Cuesta Cavilolén. Recol.: Fuentes, E., 1/ene/1977. Obs.: Ex Colección E. Fuentes.

MNHNCL HERP 1597. País: Chile, Región: Metropolitana de Santiago, Provincia: Santiago, Comuna: Macul, Localidad: Calle Joaquín Rodríguez. Recol.: ND, 31/jul/1983.

MNHNCL HERP 1698. País: Chile, Región: Metropolitana de Santiago, Provincia: Santiago, Comuna: Pudahuel, Localidad: Pudahuel. Recol.: Caro, V., 13/ene/1900.

MNHNCL HERP 1700. País: Chile, Región: Valparaíso, Provincia: Valparaíso, Comuna: Concón, Localidad: Concón. Recol.: Yáñez, J., 25/oct/1980.

MNHNCL HERP 1782. País: Chile, Región: Del Libertador General Bernardo O'Higgins, Provincia: Cachapoal, Comuna: San Vicente, Localidad: San Vicente de Taguatagua. Recol.: Cabezas, J., 23/feb/1986.

MNHNCL HERP 1793-1794. País: Chile, Región: Del Maule, Provincia: Talca, Comuna: San Clemente, Localidad: 4 km al Este de la Mina Talca. Recol.: Contreras, L., 23/nov/1984.

MNHNCL HERP 1895. País: Chile, Región: Metropolitana de Santiago, Provincia: Santiago, Comuna: Santiago, Localidad: Santiago. Recol.: Codoceo R., M., 31/mar/1955.

MNHNCL HERP 1999. País: Chile, Región: Del Libertador General Bernardo O'Higgins, Provincia: Cachapoal, Comuna: Las Cabras, Localidad: Lago Rapel, Sector El Estero. Recol.: Braemer V., A., 25/feb/1990.

MNHNCL HERP 2001. País: Chile, Región: Del Libertador General Bernardo O'Higgins, Provincia: Colchagua, Comuna: San Fernando, Localidad: Termas del Flaco. Recol.: Labra, A. & Núñez, H., 18/feb/1990.

MNHNCL HERP 2003. País: Chile, Región: Del Libertador General Bernardo O'Higgins, Provincia: Colchagua, Comuna: San Fernando, Localidad: Termas del Flaco. Recol.: González, E., 17/feb/1990.

MNHNCL HERP 2160. País: Chile, Región: Metropolitana de Santiago, Provincia: Cordillera, Comuna: San José de Maipo, Localidad: Cajón del Maipo. Recol.: ND, 31/ene/1991.

MNHNCL HERP 2291. País: Chile, Región: Antofagasta, Provincia: Antofagasta, Comuna: Taltal, Localidad: Rinconada de Paposos. Recol.: Gálvez, O. & Cornejo, A. & Villarroel, M., 1/dic/1989.

MNHNCL HERP 2498. País: Chile, Región: Valparaíso, Provincia: San Antonio, Comuna: El Quisco, Localidad: El Quisco. Recol.: Codoceo R., M., 2/ene/1955.

MNHNCL HERP 2583. País: Chile, Región: Metropolitana de Santiago, Provincia: Santiago, Comuna: Santiago, Localidad: Santiago. Recol.: ND, 30/abr/1993.

MNHNCL HERP 2989. País: Chile, Región: Coquimbo, Provincia: Choapa, Comuna: Salamanca, Localidad: Mina Los Pelambres. Recol.: Núñez, H. & Yáñez, J., 4-8/ago/1997.

MNHNCL HERP 3543. Det.: Núñez, H., ago/2002. País: Chile, Región: Metropolitana de Santiago, Provincia: Cordillera, Comuna: Pirque, Localidad: Pirque. Recol.: Niemeyer, H., 31/dic/2001

MNHNCL HERP 3544. Det.: Núñez, H., ago/2002. País: Chile, Región: Metropolitana de Santiago, Provincia: Cordillera, Comuna: Puente Alto, Localidad: Las Vizcachas. Recol.: Labra, A. & Escobar, C., 31/dic/1999.

MNHNCL HERP 3545. Det.: Núñez, H., ago/2002. País: Chile, Región: Valparaíso, Provincia: Marga Marga, Comuna: Olmué, Localidad: Ocoa. Recol.: Niemeyer, H., 31/dic/2000.

MNHNCL HERP 3807. País: Chile, Región: Coquimbo, Provincia: Limarí, Comuna: Ovalle, Localidad: Fray Jorge, Parque Nacional. Recol.: Rojas, G., 26/oct/2002.

MNHNCL HERP 4335. País: Chile, Región: Metropolitana de Santiago, Provincia: Santiago, Comuna: Renca, Localidad: Río Mapocho. Recol.: ND, 22/may/1980. Obs.: Ex Colección DBGUCH.

MNHNCL HERP 4346. País: Chile, Región: Metropolitana de Santiago, Provincia: Santiago, Comuna: Peñalolén, Localidad: Peñalolén. Recol.: ND, 15/oct/1985. Obs.: Ex Colección DBGUCH

MNHNCL HERP 4347. País: Chile, Región: Metropolitana de Santiago, Provincia: Santiago, Comuna: Pudahuel, Localidad: Pudahuel. Recol.: ND, 16/jun/1985. Obs.: Ex Colección DBGUCH.

MNHNCL HERP 4408. Det.: Veloso, A., 7/dic/1981. País: Chile, Región: Metropolitana de Santiago, Provincia: Santiago, Comuna: Lo Barnechea, Localidad: La Dehesa. Recol.: Veloso, A., 7/dic/1981. Obs.: Ex Colección DBGUCH.

MNHNCL HERP 4409. Det.: Veloso, A., 30/jun/1982. País: Chile, Región: Metropolitana de Santiago, Provincia: Santiago, Comuna: Recoleta, Localidad: Cerro San Cristóbal. Recol.: ND, 30/jun/1982. Obs.: Ex Colección DBGUCH.

MNHNCL HERP 4410. Det.: Veloso, A., 17/sep/1981. País: Chile, Región: Coquimbo, Provincia: Limarí, Comuna: Monte Patria, Localidad: El Palqui. Recol.: Egaña, P. & Moreno, E., 17/sep/1981. Obs.: Ex Colección DBGUCH.

MNHNCL HERP 4411. Det.: Veloso, A., 15/nov/1981. País: Chile, Región: Metropolitana de Santiago, Provincia: Cordillera, Comuna: Pirque, Localidad: La Puntilla. Recol.: Moreno, R., 15/nov/1981. Obs.: Ex Colección DBGUCH.

MNHNCL HERP 4413. Det.: Navarro, J., 18/feb/1982. País: Chile, Región: Valparaíso, Provincia: Valparaíso, Comuna: Puchuncaví, Localidad: Maitencillo. Recol.: Navarro, J. & Moreno, R., 18/feb/1982. Obs.: Ex Colección DBGUCH.

MNHNCL HERP 4414. Det.: Veloso, A., 26/abr/1981. País: Chile, Región: Metropolitana de Santiago, Provincia: Santiago, Comuna: Estación Central, Localidad: Carlos Valdovinos, Sector Buzeta. Recol.: Veloso, A., 26/abr/1981. Obs.: Ex Colección DBGUCH.

MNHNCL HERP 4494. Det.: Núñez, H., 30/jun/2010. País: Chile, Región: Metropolitana de Santiago, Provincia: Santiago, Comuna: Recoleta, Localidad: Cerro San Cristóbal, ladera Norponiente, Recol.: Sánchez, M., 18/sep/1981.

MNHNCL HERP 5024-5029. Det.: ND, 1984. País: Chile, Región: ND, Provincia: ND, Comuna: ND, Localidad: Chile Central. Recol.: ND, 1984. Obs.: Ex Colección DBGUCH.

MNHNCL HERP 5030. Det.: ND, 1981. País: Chile, Región: Coquimbo, Provincia: Limarí, Comuna: Ovalle, Localidad: Huanillo. Recol.: Escobar, F., 18/sep/1981. Obs.: Ex Colección DBGUCH.

*Philodryas chamissonis* - (Wiegmann, 1835) -

**Museo Regional de Concepción (MRC)**

**MRC 0258** Cerro Negro. Quillón. 10-11-1981.

**MRC 0260** Isla Mancera. Valdivia. 03-02-1973.

**MRC 0261** Huasco Bajo, Huasco. 09-05-1983.

**MRC 0263** Coelemu. 19-03-1979.

**MRC 0264** Coelemu. 19-03-1979.

**MRC 0265** Paso Hondo. Cabrero. 11-04-1982.

**MRC 0266** Huillinco Norte. Cañete. 17-02-1977.

**MRC 0267** Lomas Coloradas. Coronel. 18-02-1982.

**MRC 0277** Laraquete. 15-02-1984.

**Table S2: list of literature analyzed.**

| Article | Year | Authors                              | Full reference                                                                                                                                                                                                 |
|---------|------|--------------------------------------|----------------------------------------------------------------------------------------------------------------------------------------------------------------------------------------------------------------|
| 1       | 1834 | Wiegmann, A. F. A                    | In: Dr. F. J. F. Meyen: Beiträge zur Zoologie gesammelt auf einer Reise um die Erde. Siebente Abhandlung. Amphibien. Nova Acta Physico-Medica Academia Caesarea Leopoldino-Carolina (Halle) 17: 185-268 [1835] |
| 2       | 1837 | Schlegel, H.                         | Essai sur la physionomie des serpens. Partie Descriptive. La Haye (J. Kips, J. HZ. et W. P. van Stockum), 606 S. + xvi                                                                                         |
| 3       | 1855 | Girard, C.                           | Abstract of a report to Lieut. James M. Gilliss, U.S.N., upon the reptiles collected during the U.S.N. Astronomical Expedition to Chili. Proc. Acad. Nat. Sci. Philadelphia 7 [1854]: 226-227                  |
| 4       | 1860 | Philippi, Rodulfo Amando             | Viage al Desierto de Atacama Reptiles 148-151. 1 Lámina                                                                                                                                                        |
| 5       | 1860 | Philippi, Rodulfo Amando             | Reise durch die Wüste Atacama auf Befehl der chilenischen Regierung im Sommer 1853-54. Unternommen und Beschrieben von Rudolph Amandus Philippi. Halle: Eduard Anton                                           |
| 6       | 1864 | Philippi, Rodulfo Amando             | Descripción de tres especies nuevas de reptiles Chilenos. Anales Univ. Chile 8 (1): 744-748                                                                                                                    |
| 7       | 1894 | Boulenger, George A.                 | Catalogue of the snakes in the British Museum (Natural History). Volume II., Containing the Conclusion of the Colubridæ Aglyphæ. British Mus. (Nat. Hist.), London, xi, 382 pp.                                |
| 8       | 1899 | Philippi, R.A.                       | Serpientes de Chile & Descripciones breves de dos especies nuevas de sapo (Bufo). Anales Universidad de Chile 104: 723-725                                                                                     |
| 9       | 1899 | Philippi, Rodulfo Amando             | Sobre las serpientes de Chile. Anales Univ. Chile 104: 715-723                                                                                                                                                 |
| 10      | 1900 | Boulenger, George A.                 | Descriptions of new batrachians and Reptiles collected by Mr. P. O. Simons in Peru. Ann. Mag. Nat. Hist. (7) 6 (32): 181-186                                                                                   |
| 11      | 1916 | Quijada, Bernardino                  | Catálogo sistemático de los reptiles chilenos y extranjeros conservador en el Museo de Historia Natual. Boletín Museo Nacional 22-47                                                                           |
| 12      | 1932 | Parker, H.W.                         | Some new or rare reptiles and amphibians from southern Ecuador. Ann. Mag. Nat. Hist. 1932, (10) 9: 21-26                                                                                                       |
| 13      | 1937 | Helmich, W.                          | Anotaciones para el conocimiento de las culebras de Chile. Rev. Chil. Hist. Nat. 41, 1937. 107-110.                                                                                                            |
| 14      | 1938 | Johow A.                             | Mordedura de culebra. Bol Soc Cirugía (Rev Méd Chile) 1938; 66: 661-3.                                                                                                                                         |
| 15      | 1938 | Rayo F, Covarrubias R, Ruiz M.       | Mordedura de serpiente. Bol Soc Cirugía (Rev Méd Chile) 1938; 66: 773-9.                                                                                                                                       |
| 16      | 1940 | Gigoux E R                           | Los ofidios chilenos. Santiago de Chile. Bol Museo Nacional Hist Natural 1940; 18: 5.                                                                                                                          |
| 17      | 1943 | Schmidt, KP., Walker, WF.            | Snakes of the Peruvian coastal region. Zool. Ser. Field Mus. nat. Hist., Chicago, 1943, 24: 297-327                                                                                                            |
| 18      | 1943 | Schmidt, K. P.; W. F. Walker, Jr.    | Three new snakes from the Peruvian Andes. Field Museum of Natural History, Chicago - Zoological Series 24 (28): 325-329                                                                                        |
| 19      | 1943 | Schmidt, Karl P. & Walker, Warren F. | Peruvian snakes from the University of Arequipa. Zoological Series of Field Museum of Zoology 24 (26): 279-296                                                                                                 |

|    |      |                                     |                                                                                                                                                                             |
|----|------|-------------------------------------|-----------------------------------------------------------------------------------------------------------------------------------------------------------------------------|
| 20 | 1944 | Luer, HG.                           | Un caso teratológico en un ofidio chileno. Bol. Soc. Biol. Concep. 19, 1944. 83-86.                                                                                         |
| 21 | 1945 | Pflaumer, K.                        | Un segundo hallazgo de una culebra con dos cabezas en Chile. Rev. Chil. His. Nat.48, 1945. 97-102                                                                           |
| 22 | 1947 | Gajardo- Tobar R                    | ¿Los ofidios chilenos son capaces de envenenar?. Bol Hosp Viña del Mar (Chile) 1947; 3: 43-51.                                                                              |
| 23 | 1950 | Donoso-Barros, R y Candiani, S.     | Reptiles de la provincia de santiago. Rev. Acad. Colomb. Ciencias Exac. 1950. 7, 28, 482-489.                                                                               |
| 24 | 1950 | Codoceo, M.                         | Reptiles de Tarapaca. (Nota preliminar). Invest. Zool. Chilenas 1: 15.                                                                                                      |
| 25 | 1954 | Schenone H, Bertín V, Mann G.       | Un nuevo caso de ofidismo. Bol Chil Parasitol 1954; 9:88-9.                                                                                                                 |
| 26 | 1958 | Codoceo, M.                         | Distribución geográfica de las serpientes ponzoñosas. Not. Mens. Mus. Hist. Nat.II, 1958. 12, 5-7                                                                           |
| 27 | 1958 | Gajardo- Tobar R                    | Cinco casos de ofidismo. Bol Hosp Viña del Mar (Chile) 1958; 15: 25-38.                                                                                                     |
| 28 | 1958 | Marx,H                              | Catalogue of type specimens of reptiles and amphibians in Chicago Natural History Museum. Fieldiana Zool. 36: 407-496                                                       |
| 29 | 1959 | Donoso-Barros, R, Cardenas,S.       | Estudio del veneno de dromicus chamissonis (wiegmann), inv, zool. chil. 1959. 5, 93-95.                                                                                     |
| 30 | 1960 | Peters , J. A.                      | The snakes of Ecuador; check list and key. Bull. Mus. Comp. Zool. Harvard, 1960, 122: 489-541                                                                               |
| 31 | 1961 | Donoso-Barros, R.                   | The Reptiles of the Lund University Chile Expedition. Copeia 4, 486-488.                                                                                                    |
| 32 | 1961 | Donoso-Barros, R.                   | Emponzoñamiento por ofidios chilenos. Rev Pediatr Clin Soc 1961; 1: 65-79.                                                                                                  |
| 33 | 1962 | Donoso-Barros, R.                   | Los ofidios chilenos. Not. Mens. Mus. Hist. Nat. 1962; 6. 66, 3-8                                                                                                           |
| 34 | 1962 | Donoso-Barros, R, Cardenas,S.       | El veneno de las culebras chilenas. Not. Mens. Mus. Hist. Nat, 1962. 74, 2-4.                                                                                               |
| 35 | 1964 | Donoso-Barros, R.                   | Ecología de los reptiles del sur de Coquimbo. Zooiatría 3: 11, 2-4                                                                                                          |
| 36 | 1965 | Donoso-Barros,R., Cardenas,S.       | Los tipos de serpientes de Rodulfo Armando Philippi, en el Museo De Historia Natural de Santiago de Chile. Actas Ii Congr. Sudam. Zool.1965. 2, 225-234.                    |
| 37 | 1965 | Schenone H, Reyes H.                | Animales ponzoñosos de Chile. Bol Chil Parasitol 1965; 20: 104-9                                                                                                            |
| 38 | 1965 | Donoso-Barros, R. y Sergio Cárdenas | Los tipos de serpiente de Rodulfo Amando Philippi, en el Museo de Historia Natural de Santiago de Chile. Actas 2º Conreso Latinoam. Zoologia. 2; 225-234. Sao Paulo. Brasil |
| 39 | 1969 | Webb, RG., Greer, JK.               | Amphibians and reptiles from Malleco Province, Chile. Publ. Mus. Michigan State Univ. Biol. Ser. 1969, 4: 193-226.                                                          |
| 40 | 1969 | Dowling H.G.                        | The hemipenis of Philodryas Günther: a correction (Serpentes, Colubridae). American Museum Novitates 2375: 1-6.                                                             |
| 41 | 1970 | Donoso-Barros, R.                   | Catálogo herpetológico chileno. Boletín del Museo Nacional de Historia Natural, Chile 31: 49-124 (1970)                                                                     |
| 42 | 1974 | Donoso-Barros, R.                   | Nuevos reptiles y anfibios de Chile. Bol. Soc. Biol. Concepción (Chile), 1974, 48: 217-229.                                                                                 |
| 43 | 1977 | Thomas, R.A.                        | A New Generic Arrangement for Incaspis and Mainland South American Alsophis and the Status of Two Additional Peruvian Species. Copeia 1977 (4): 648-652                     |

|    |      |                                                        |                                                                                                                                                                                                                               |
|----|------|--------------------------------------------------------|-------------------------------------------------------------------------------------------------------------------------------------------------------------------------------------------------------------------------------|
| 44 | 1980 | Dixon, J. R.                                           | The neotropical colubrid snake genus <i>Liophis</i> . The generic concept. Milwaukee Public Museum Contributions in Biology and Geology 31: 1-40                                                                              |
| 45 | 1980 | Yáñez, J., H. Núñez, R. P. Schlatter & F. M. Jaksic.   | Prey of the Harris' Hawk in Central Chile. Auk (1980) 97: 629–631.                                                                                                                                                            |
| 46 | 1981 | Jaksić, F.M., Greene, H.W., Yáñez, J.L.                | The guild structure of a community of predatory vertebrates in central Chile (1981) <i>Oecologia</i> , 49 (1), pp. 21-28. DOI: 10.1007/BF00376893                                                                             |
| 47 | 1981 | Jaksic, F., Nuñez, H., Yañez                           | Nuevo cambio taxonómico para la culebra de cola larga (Reptilia, Ophidia, Colubridae). Not. Mens. Mus.Nac. Hist. Nat. (Chile),1981, 293: 12.                                                                                  |
| 48 | 1982 | Simonetti, J., H. Núñez & J. Yañez                     | Falco sparverius L.: Rapaz generalista en Chile central. Boletín del Museo Nacional de Historia Natural (1982) 39: 119–124.                                                                                                   |
| 49 | 1984 | Nuñez, H                                               | Culebras chilenas: más allá del mito. Revista Naturaleza (Chile)1984, 2 (9): 16-19.                                                                                                                                           |
| 50 | 1987 | Troncoso, JF., Ortiz, JC.                              | Catálogo Herpetológico del Museo Regional de Concepción. Comunicaciones del Museo Regional de Concepción (Chile), 1987, 1: 9-19.                                                                                              |
| 51 | 1987 | Moreno R, Navarro J, Iturra P, Veloso AM.              | The karyotype of <i>Philodryas chamissonis</i> (Colubridae). Identification of nucleolar organizer region (NOR) and sex chromosomes by banding methods. Braz. J Genetics,1987, 3: 497-506.                                    |
| 52 | 1987 | Jaksic FM & M Delibes                                  | A comparative analysis of food – niche relationships and trophic guild structure in two assemblages of vertebrate predators differing in species richness: causes, correlations and consequences. <i>Oecologia</i> 71:461-472 |
| 53 | 1988 | Medel, R.G., Jimenez, J.E., Fox, S.F., Jaksic, F.M.    | Experimental evidence that high population frequencies of lizard tail autotomy indicate inefficient predation (1988) <i>Oikos</i> , 53 (3), pp. 321-324.                                                                      |
| 54 | 1988 | Bozinovic, F., Rosenmann, M.                           | Energetics and food requirements of the female snake <i>Philodryas chamissonis</i> during the breeding season. <i>Oecologia</i> , 1988, 75: 282-284.                                                                          |
| 55 | 1988 | Veloso, A., Navarro, J.                                | Lista sistemática y distribución geográfica de anfibios y reptiles de Chile. Bull. Mus. Reg. Sei. Nat. Torino, 1988, 6(2): 481-539.                                                                                           |
| 56 | 1988 | Ortíz, JC.                                             | Situación de la exportación de los vertebrados terrestres chilenos. Comunicaciones del Museo Regional de Concepción (Chile), 1988, 2: 37-41.                                                                                  |
| 57 | 1990 | Jimenez J, Jaksic F.                                   | Historia Natural del Aguila <i>Geranoaetus melanoleucus</i> : una revisión. El Hoernero(Buenos Aires) - Revista de Ornitología Neitropical. (1990) 13, 2: 97-110,                                                             |
| 58 | 1990 | Medel, R. G., P.A. Marquet, S. F. Fox. & F. M. Jaksic. | Depredación sobre lagartijas en Chile central: importancia relative de atributos ecológicos y morfológicos Revista Chilena de Historia Natural 63: 261-266                                                                    |
| 59 | 1991 | Lazo, I., Anabalón, J.                                 | Nesting of the common Diuca finch in the central Chilean scrub. <i>Wilson Bulletin</i> , 1991, 103: 143-146.                                                                                                                  |
| 60 | 1992 | Greene, HW., Jaksic, FM.                               | The feeding behavior and natural history of two Chilean snakes, <i>Philodryas chamissonis</i> and <i>Tachymenis chilensis</i> (Colubridae). <i>Revista Chilena de Historia Natural</i> , 1992, 65: 485-493.                   |
| 61 | 1992 | Nuñez, H                                               | Geographical data of Chilean lizards and snakes in the Museo Nacional de Historia Natural, Santiago, Chile.                                                                                                                   |

|    |      |                                                                                                 |                                                                                                                                                                                                                               |
|----|------|-------------------------------------------------------------------------------------------------|-------------------------------------------------------------------------------------------------------------------------------------------------------------------------------------------------------------------------------|
|    |      |                                                                                                 | Smithsonian Herpetological Information Service, 1992, 91: 1-29.                                                                                                                                                               |
| 62 | 1992 | Habit, EM., Ortiz, JC., Victoriano, P.                                                          | Osteología craneana de <i>Philodryas chamissonis</i> (Wiegmann, 1834) (Colubridae, Serpentes). Boletín de la Sociedad de Biología de Concepción (Chile), 1992, 63: 83-92.                                                     |
| 63 | 1992 | Nuñez, H., Jaksic, F.                                                                           | Lista comentada de los reptiles terrestres de Chile Continental. Bol. Mus. Nac. Hist. Nat. Chile, 43: 63-91 (1992)                                                                                                            |
| 64 | 1993 | Jaksic FM, P Fisinger y JE Jiménez                                                              | A long term study on the dynamics of guild structure among predatory vertebrates at a semi-arid Neotropical site <i>Oikos</i> 67: 87-96                                                                                       |
| 65 | 1994 | Lobo, F., Scrocchi, G.                                                                          | Osteología craneal del género <i>Philodryas</i> (Serpentes: colubridae). Cuadernos de Herpetología; 1994, 8, 1, 104-111.                                                                                                      |
| 66 | 1994 | Arzola J, Schenone H.                                                                           | Dos casos nuevos de ofidismo en Chile. Bol Chil Parasitol 1994; 49: 69-70.                                                                                                                                                    |
| 67 | 1995 | Carrillo De Espinoza, N., Icochea, J.                                                           | Lista taxonómica preliminar de los reptiles vivientes del Perú. Publ. Mus. Hist. Nat. UNMSM, 1995, 49:1-27                                                                                                                    |
| 68 | 1996 | Díaz, I & J. A. Simonetti.                                                                      | Vertebrados en áreas silvestres protegidas; reptiles de la Reserva Nacional Río Clarillo, Chile Central. Vida Silvestre Neotropical 5 2: 140-142                                                                              |
| 69 | 1997 | Thomas, R.A.                                                                                    | Galapagos Terrestrial Snakes: Biogeography and Systematics. <i>Herp. Nat. Hist.</i> 5(1): 19-40. 1997.                                                                                                                        |
| 70 | 1999 | Kuch, U.                                                                                        | Notes on two cases of human envenomation by the South American colubrid snakes <i>Philodryas olfersi latirostris</i> COPE, 1862 and <i>Philodryas chamissonis</i> (WIEGMANN, 1834). <i>Herpetozoa</i> , 1999, 12 (1-2): 11-16 |
| 71 | 2000 | Moreno, R., Moreno, J., Torres-Pérez, F. & J.C. Ortiz.                                          | Reptiles del Parque Nacional “Nevados de Tres Cruces” (III Región, Chile). Boletín Sociedad Biología de Concepción (Chile) 71: 41–43.                                                                                         |
| 72 | 2001 | Grehan, John                                                                                    | Biogeography and evolution of the Galapagos: integration of the biological and geological evidence. <i>Biological Journal of the Linnean Society</i> 74: 267–287                                                              |
| 73 | 2001 | Moreno M, Rodrigo, Moreno, Jorge, Torres-Pérez, Fernando, Ortiz, Juan C., & Breskovic, Antonio. | Catálogo Herpetológico del Museo del Mar de la Universidad Arturo Prat de Iquique, Chile. <i>Gayana</i> . 65 (2) 2001                                                                                                         |
| 74 | 2002 | Moreno, R., Moreno, J., Ortiz, JC., Victoriano, P., Torres-Pérez, F.                            | Herpetofauna del Parque Nacional Llanos de Challe (III Región, Chile). <i>Gayana</i> , 2002, 66: 7-10.                                                                                                                        |
| 75 | 2003 | Pincheira-Donoso, D                                                                             | Record of the colubrid snake <i>Philodryas simonsii</i> Boulenger from Chile (2003) <i>Herpetological Bulletin</i> , (84), p. 20                                                                                              |
| 76 | 2003 | Escobar, MA., Vukasonic, MA.                                                                    | Depredación de <i>Philodryas chamissonis</i> (Serpentes:Colubridae) sobre polluelos de <i>Aphrastura spinicauda</i> (Passeriformes: Furnariidae): ¿Una culebra arborícola?. <i>Not. Men. Mus. Hist. Nat.</i> 2003, 352:18-20  |
| 77 | 2004 | Labra, A., Niemeyer, H.M.                                                                       | Variability in the assessment of snake predation risk by <i>Liolaemus</i> lizards (2004) <i>Ethology</i> , 110 (8), pp. 649-662. DOI: 10.1111/j.1439-0310.2004.01005.x                                                        |
| 78 | 2005 | Fredes, F., Raffo, E.                                                                           | <i>Raillitiella</i> sp. finding on chilean long tailed snake ( <i>Philodryas chamissonis</i> ) from a zoo of the Metropolitan Region (2005) <i>Parasitologia Latinoamericana</i> , 60 (3-4), pp. 189-191.                     |

|    |      |                                                                                                        |                                                                                                                                                                                                                                                         |
|----|------|--------------------------------------------------------------------------------------------------------|---------------------------------------------------------------------------------------------------------------------------------------------------------------------------------------------------------------------------------------------------------|
| 79 | 2006 | Sepulveda, M., Vidal, M.A., Fariña, J.M.                                                               | Microlophus atacamensis Predation. Herpetological Review, 2006, 37: 224–225.                                                                                                                                                                            |
| 80 | 2007 | Mella, J.E.                                                                                            | Reptiles from "El Morado" natural monument (Region Metropolitana, Chile): Relative abundance, altitudinal distribution, and preference by different sizes of rocks (2007) Gayana, 71 (1), pp. 16-26.                                                    |
| 81 | 2007 | Aguilar, C., Lundberg, M., Siu-Ting, K., Jiménez, M.E.                                                 | Nuevos registros para la herpetofauna del departamento de Lima, descripción del renacuajo de Telmatobius rimac Schmidt, 1954 (Anura: Ceratophryidae) y una clave de los anfibios. Rev. peru biol. v.14 n.2 Lima dic. 2007                               |
| 82 | 2007 | Neira, O.P., Jofre, M.L., Oschilewski, L.D., Subercaseaux, S.B., Munoz, S.N.                           | Mordedura por Philodryas chamissonis. Presentacion de un caso y revision de la literatura. Rev. Chil. Infectol. 2007, 24, 236-241.                                                                                                                      |
| 83 | 2008 | Zaher, H., Scrocchi, G., Masiero, R.                                                                   | Rediscovery and redescription of the type of Philodryas laticeps Werner, 1900 and the taxonomic status of P. oligolepis Gomes, 1921 (Serpentes, Colubridae). Zootaxa 1940: 25–40 (2008).                                                                |
| 84 | 2009 | Lobos, G., Escobar, MAH., Thomson, RF., Alzamora, A.                                                   | Philodryas chamissonis (long-tailed snake) and Liolaemus nitidus. Predation determined by pit tag. Herpetol. Rev. 40: 358.                                                                                                                              |
| 85 | 2011 | Sallaberry-Pincheira, N., Garin, C.F., González-Acuña, D., Sallaberry, M.A., Vianna, J.A.              | Genetic divergence of Chilean long-tailed snake (Philodryas chamissonis) across latitudes: Conservation threats for different lineages (2011) Diversity and Distributions, 17 (1), pp. 152-162. DOI: 10.1111/j.1472-4642.2010.00729.x                   |
| 86 | 2011 | Troncoso-Palacios, J. & Y. Marambio.                                                                   | Lista comentada de los reptiles de la Región de Atacama. Boletín del Museo Regional de Atacama 2: 60–78                                                                                                                                                 |
| 87 | 2012 | Grazziotin, F.G., Zaher, H., Murphy, R.W., Scrocchi, G., Benavides, M.A., Zhang, Y.-P., Bonatto, S.L., | Molecular phylogeny of the New World Dipsadidae (Serpentes:Colubroidea): a reappraisal. Cladistics, 2012, 28, 437-459.                                                                                                                                  |
| 88 | 2013 | Muñoz-Leal, S., Ardiles, K., Figueroa, R.A., González-Acuña, D.                                        | Philodryas chamissonis (Reptilia: Squamata: Colubridae) preys on the arboreal marsupial Dromiciops gliroides (Mammalia: Microbiotheria: Microbiotheriidae) (2013) Brazilian Journal of Biology, 73 (1), pp. 15-17. DOI: 10.1590/S1519-69842013000100003 |
| 89 | 2013 | Skewes, O., Acuña, L., San Martín-Órdenes, J.                                                          | Depredación de polluelos de chercán (Troglodytes aedon) por la culebra de cola larga (Philodryas chamissonis). Bole Chileno de Ornitología. Unión de Ornitólogos de Chile. 2013, 19 (1-2): 30-33.                                                       |
| 90 | 2014 | Zaher, H., Arredondo, J.C., Valencia, J.H., Arbeláez, E., Rodrigues, M.T., Altamirano-Benavides, M.    | A new Andean species of Philodryas (Dipsadidae, Xenodontinae) from Ecuador (2014) Zootaxa, 3785 (3), pp. 469-480. DOI: 10.11646/zootaxa.3785.3.8                                                                                                        |
| 91 | 2014 | Uribe, S., Estades, C.F.                                                                               | Reptiles in monterey pine plantations of the Coastal Range of Central Chile (2014) Revista Chilena de Historia Natural, 87 (1), art. no. 25, .DOI: 10.1186/s40693-014-0025-z                                                                            |
| 92 | 2014 | Troncoso-Palacios, J.                                                                                  | Nueva lista actualizada de los reptiles terrestres de la Región de Atacama, Chile. Boletín Chileno de Herpetología, 2014, 1: 1-4                                                                                                                        |



|     |      |                                                                            |                                                                                                                                                                                                                                                                               |
|-----|------|----------------------------------------------------------------------------|-------------------------------------------------------------------------------------------------------------------------------------------------------------------------------------------------------------------------------------------------------------------------------|
| 93  | 2015 | Urta, F.A., Pulgar, R., Gutiérrez, R., Hodar, C., Cambiasso, V., Labra, A. | Identification and molecular characterization of five putative toxins from the venom gland of the snake <i>Philodryas chamissonis</i> (Serpentes: Dipsadidae) (2015) <i>Toxicon</i> , 108, art. no. 5202, pp. 19-31. DOI: 10.1016/j.toxicon.2015.09.032                       |
| 94  | 2015 | Labra, A., Hoare, M                                                        | Chemical recognition in a snake–lizard predator–prey system (2015) <i>Acta Ethologica</i> , 18 (2), pp. 173-179. DOI: 10.1007/s10211-014-0203-7                                                                                                                               |
| 95  | 2015 | Venzal, J.M., González-Acuña, D., Muñoz-Leal, S., Mangold, A.J., Nava, S.  | Two new species of <i>Ornithodoros</i> (Ixodida; Argasidae) from the Southern Cone of South America (2015) <i>Experimental and Applied Acarology</i> , 66 (1), pp. 127-139. DOI: 10.1007/s10493-015-9883-                                                                     |
| 96  | 2015 | Jara, M., Pincheira-Donoso, D.                                             | The neck flattening defensive behaviour in snakes: First record of hooding in the South American colubrid genus <i>Philodryas</i> (2015) <i>Animal Biology</i> , 65 (1), pp. 73-79. DOI: 10.1163/15707563-00002459                                                            |
| 97  | 2015 | Castro-Pastene, C., Carrasco, H., & Troncoso-Palacios, J.                  | Lagartijas y serpientes del Parque Nacional Radal Siete Tazas. <i>Boletín Chileno de Herpetología</i> . 2: 12-16.                                                                                                                                                             |
| 98  | 2016 | Ruiz de Gamboa, M                                                          | Lista actualizada de los reptiles de Chile. <i>Boletín Chileno de Herpetología</i> . 3: 7-12.                                                                                                                                                                                 |
| 99  | 2017 | Torres, F                                                                  | Observación de culebra de cola larga, <i>Philodryas chamissonis</i> (Wiegmann 1835) (Squamata: Dipsadidae) depredando sobre un polluelo de yal ( <i>Phrygilus fruticeti</i> ). <i>Boletín Chileno de Herpetología</i> . 4: 21.                                                |
| 100 | 2017 | Reyes-Olivares, R; Sepulveda-Luna, E., Labra, A.                           | <i>Philodryas chamissonis</i> (Chilean Green Racer). Diet. <i>Herpetological review</i> 48 (4) 2017: 865-866.                                                                                                                                                                 |
| 101 | 2018 | Constanzo-Chávez, J., Penna, M., Labra, A.                                 | Comparing the antipredator behaviour of two sympatric, but not syntopic, <i>Liolaemus</i> lizards. <i>Behav Processes</i> . 2018;148:34-40. doi: 10.1016/j.beproc.2018.01.005.                                                                                                |
| 102 | 2018 | San Martín-Ordenes, J., González-Acuña, D.                                 | Zoocide of a Chilean green racer <i>Philodryas chamissonis</i> (Serpentes: Dipsadinae) for preying nestlings of house wren ( <i>Troglodytes aedon</i> : Aves): Biophilia with double standard?. <i>Gestión Ambiental</i> , 2018, 35: 5-11.                                    |
| 103 | 2018 | Blanco, JP., Altamirano, ta., Rojas, N., Arellano, E., Bonacic, C.         | Uso de cajas-nidos por la culebra <i>Philodryas chamissonis</i> (Wiegmann 1835) (Squamata, Dipsadidae) y la lagartija <i>Liolaemus tenuis</i> (Duméril Y Bibron 1837) (Squamata, Liolaemidae) en viñedos de Chile central. <i>Boletín Chileno de Herpetología</i> . 5: 29-30. |
| 104 | 2019 | San Martín-Ordenes, J., Muñoz-Leal, S., Garín, C., González-Acuña, D.      | A systematic review of parasites and micropredators of non-avian reptiles (Reptilia=Sauropsida) in Chile. <i>Zootaxa</i> 2019, 4543, (3): 301-340.                                                                                                                            |
| 105 | 2019 | Cañas, J & Urta, F.                                                        | <i>Philodryas chamissonis</i> . Nocturnal activity. <i>Herpetological review</i> . 2019. 600                                                                                                                                                                                  |
| 106 | 2019 | Cabeza, O. Vargas, E. Ibarra, C & Urta, FA                                 | Observations on reproduction in captivity of the endemic long-tailed snake <i>Philodryas chamissonis</i> (Wiegmann, 1835)(Reptilia, Squamata, Dipsadidae) from Chile. <i>Herpetozoa</i> 32: 203-209<br>doi: 10.3897/herpetozoa.32.e36705                                      |
